# Supplementary material for: Spin-transfer-torque mediated quantum magnetotransport in MoS2/phosphorene vdW heterostructure based MTJs
Source: Royal Society of Chemistry journal article supplement (doi:10.1039/d0cp00836b), 2020-01-01
Supplement: d0cp00836b1.pdf [file d0cp00836b1.pdf]

Supplementary Material

**Spin-transfer-torque mediated quantum magnetotransport in MoS<sub>2</sub>/Phosphorene vdW  
Heterostructure based MTJs**

Sushant Kumar Behera and Pritam Deb\*

*Advanced Functional Material Laboratory (AFML), Department of Physics, Tezpur University  
(Central University), Tezpur-784028, India.*

\*Corresponding author

Email address: pdeb@tezu.ernet.in (Pritam Deb)

**NEGF Formalism**

Within the NEGF-DFT framework, we use the self-energy form in the retarded Green's function

where,  $w'_L = \begin{pmatrix} w_L & 0 & 0 \\ 0 & 0 & 0 \\ 0 & 0 & 0 \end{pmatrix}$  and  $w'_R = \begin{pmatrix} w_R & 0 & 0 \\ 0 & 0 & 0 \\ 0 & 0 & 0 \end{pmatrix}$  are the co-efficient to present the left and right lead region. In this DFT simulation with plain wave basis, 'w' would be calculated in the orbital space.

$$w_{\mu\vartheta} = \int dr \varpi_{\mu}^*(r) w(z) \varpi_{\vartheta}(r)$$

Where,  $\varpi_{\mu(\vartheta)}$  is the atomic basis set and  $w(z)$  is defined in the real space.

$$w(z) = \frac{\hbar^2}{2m} \left( \frac{2\pi}{\Delta m} \right)^2 f(z)$$

Here,  $\Delta z = z_1 - z_2$  is the length of the scattering region with  $z_1$  and  $z_2$  are the starting and ending points, respectively of each lead along the transport direction  $z$ .

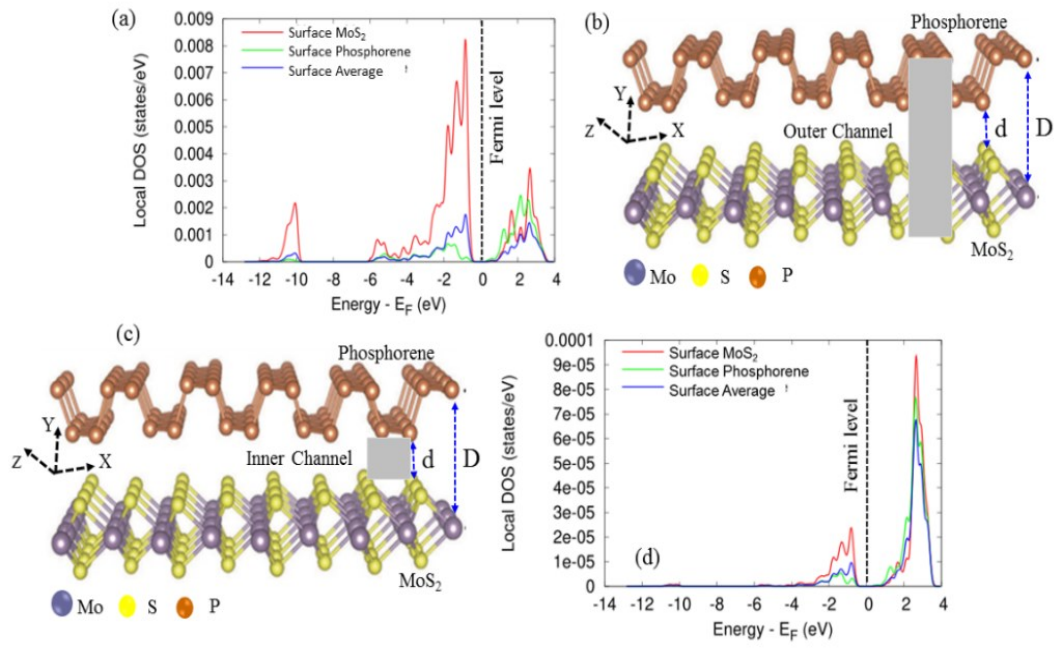

**Figure S1.** Density of states for surface of the monolayer along with local states of the bilayer (a) where the first vacuum level is localized in (b). Similarly, the DOS pattern of the systems (c) and corresponding second vacuum level (d) have been shown.

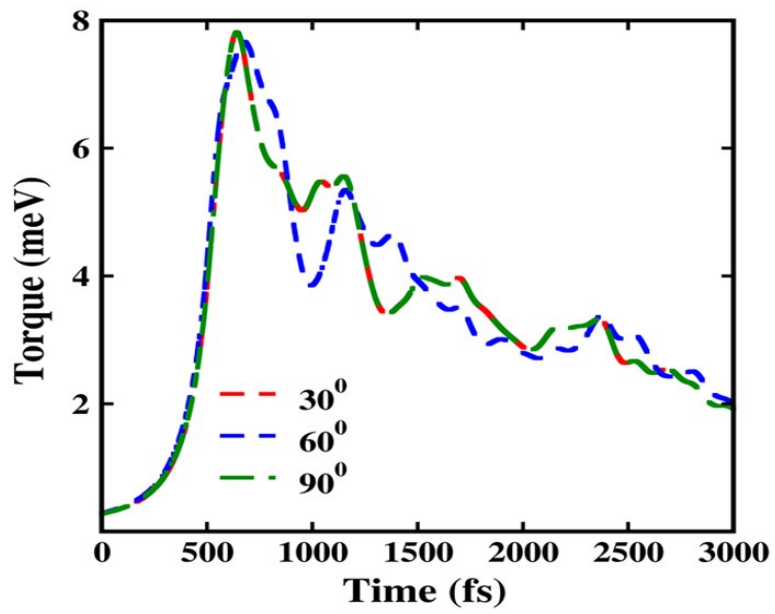

**Figure S2.** Time-dependent spin-current induced STT of Fe/MoS<sub>2</sub>-P/Pt layers under positive bias of 30 mV with different  $\theta$ .
